# Supplementary material for: Expression patterns of the immunomodulatory enzyme arginase 1 in blood, lymph nodes and tumor tissue of early-stage breast cancer patients
Source: PubMed Central journal article supplement — Oncoimmunology. 2012 Nov 1;1(8):1305–12. doi: 10.4161/onci.21678 (PMC3518503; doi:10.4161/onci.21678), 2012-11-01
Supplement: onci-1-1305-s01.pdf [file onci-1-1305-s01.pdf]

## **Supplemental Material to:**

**Jana de Boniface, Yumeng Mao, Jan Schmidt-Mende, Rolf  
Kiessling and Isabel Poschke**

**Expression patterns of the immunomodulatory enzyme  
arginase 1 in blood, lymph nodes and tumor tissue of  
early-stage breast cancer patients**

**Oncoimmunology 2012; 1(8)**

**<http://dx.doi.org/10.4161/onci.21679>**

**[http://www.landesbioscience.com/journals/oncoimmunology/  
article/21679](http://www.landesbioscience.com/journals/oncoimmunology/article/21679)**

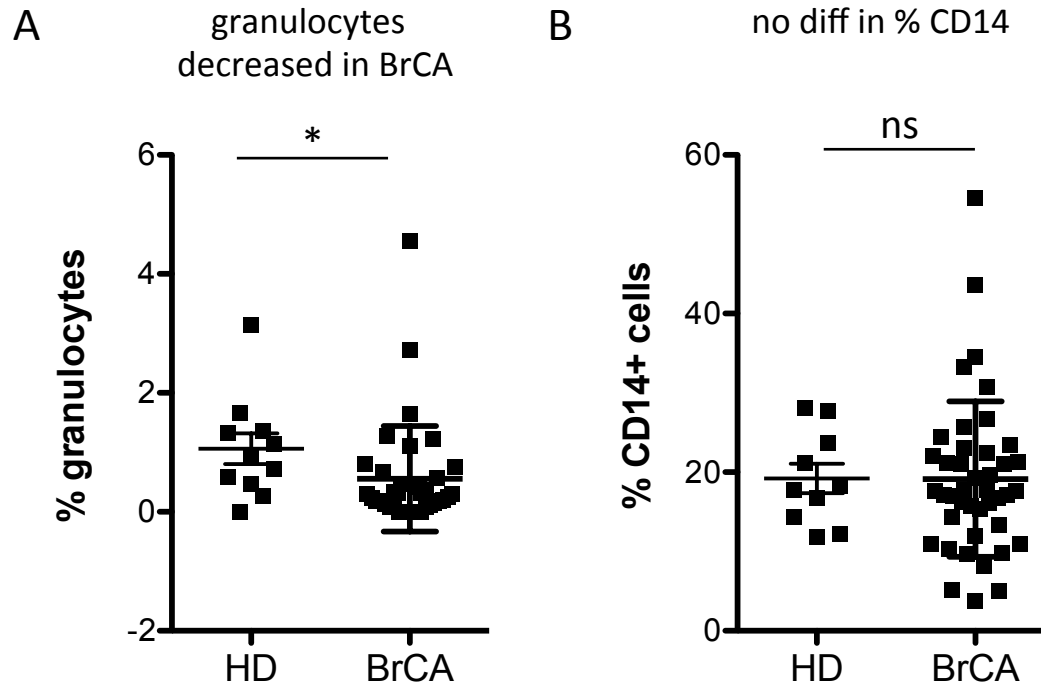

(A) Frequencies of granulocytes in HD (n=11) and BrCA (n=36);  
(B) Frequency of CD14+ cells in HD (n=10) and BrCA (n=32)
